# Supplementary material
Source: ML conference proceedings conference paper supplement (https://proceedings.neurips.cc/paper_files/paper/2018/hash/91c77393975889bd08f301c9e13a44b7-Abstract.html)
Supplement: Supplementary file [file 91c77393975889bd08f301c9e13a44b7-Supplemental.zip]

## A Discussions on Tuning $\beta$

In this section, we discuss the challenges in tuning  $\beta$  via other approaches. Recall that by the calculation shown after Theorem 1, a  $\beta$  such that  $\frac{1}{2}\alpha_T(u^*) \leq \beta \leq \alpha_T(u^*)$  where  $u^* \triangleq \operatorname{argmin}_{u \in \bar{\Delta}_N} \sum_{t=1}^T f_t(u)$  ensures a regret bound of  $\mathcal{O}(N^2(\ln T)^3)$ . We first show the existence of such  $\beta$  when the environment is *oblivious*, that is,  $r_1, \dots, r_T$  are all fixed ahead of time. (However, we emphasize that our adaptive tuning method introduced in Section 3 does not rely on the existence of such  $\beta$  at all and works even against non-oblivious environments.)

When  $r_1, r_2, \dots, r_T$  are fixed and thus  $u^*$  is also fixed, one can view  $\alpha_T(u^*)$  as a (complicated) function of  $\beta$ . It is not hard to see that this function is continuous: note that  $x_{t+1}$  is a continuous function with respect to  $\beta, A_t, \eta_t, x_t, \nabla_t$  because  $x_{t+1}$  is the minimizer of a strongly convex function parameterized by these quantities. Also,  $A_t, \eta_t, \nabla_t$  are continuous functions of  $\{x_1, \dots, x_t\}$ .<sup>4</sup> So overall,  $x_{t+1}$  is a continuous function of  $\{\beta, x_1, \dots, x_t\}$ . By induction, we know that  $x_t$  is a continuous function of  $\beta$  for all  $t$ . Finally, since  $\alpha_T(u^*)$  continuously depends on  $\{x_1, \dots, x_T\}$ , it is also a continuous function of  $\beta$ .

Next note that the range of  $\alpha_T(u^*)$  is  $[\frac{1}{16NT}, \frac{1}{2}]$  because  $8|\nabla_t^\top(u^* - x_t)| \leq 8\|\nabla_t\|_\infty \|u^* - x_t\|_1 \leq 16NT$ . Thus by intermediate value theorem, if we vary  $\beta$  from  $\frac{1}{32NT}$  to  $\frac{1}{2}$ , there must exist a  $\beta$  such that  $\frac{1}{2}\alpha_T(u^*) \leq \beta \leq \alpha_T(u^*)$ , which completes our argument. In fact, by  $\alpha_T(u^*)$ 's continuity, the set of  $\beta$ 's satisfying the inequality will form an interval or a union of intervals.

Given that such  $\beta$  does exist but is unknown, a natural idea is to instantiate  $M$  copies of BARRONS's with different  $\beta$ 's forming a grid on  $[\frac{1}{32NT}, \frac{1}{2}]$ , then use Hedge to learn over these copies, which only introduces an additional  $\ln M$  regret since the loss is exp-concave. If any of these  $\beta$ 's happens to fall into one of the intervals described above, then the algorithm has overall regret  $\mathcal{O}(N^2(\ln T)^3 + \ln M)$ .

However, the challenge is to figure out how dense the grid has to be, which depends on the slope (i.e. Lipschitzness) of  $\alpha_T(u^*)$  with respect to  $\beta$ . The larger the slope, the denser the grid needs to be. Trivial analysis only shows that the Lipschitzness is exponential in  $T$ , which is far from satisfactory. Also note that the running time per round of this algorithm is  $(MN^{3.5})$ . Therefore even if  $M$  is polynomial in  $T$  which is good for the regret, it still defeats our purpose of deriving more efficient algorithms.

## B Omitted Proofs

We first show that competing with smooth CRP from  $\bar{\Delta}_N$  is enough.

**Lemma 10.** *For any  $u' \in \Delta_N$ , with  $u = (1 - \frac{1}{T})u' + \frac{1}{NT} \in \bar{\Delta}_N$  we have*

$$\sum_{t=1}^T f_t(x_t) - \sum_{t=1}^T f_t(u') \leq \sum_{t=1}^T f_t(x_t) - \sum_{t=1}^T f_t(u) + 2.$$

*Proof.* By convexity of  $f_t$ , we have

$$\begin{aligned} \sum_{t=1}^T f_t(u) - \sum_{t=1}^T f_t(u') &\leq \sum_{t=1}^T \nabla f_t(u)^\top (u - u') \leq \sum_{t=1}^T \frac{(u' - u)^\top r_t}{u^\top r_t} \\ &\leq \sum_{t=1}^T \frac{\left(\frac{u}{1-\frac{1}{T}} - u\right)^\top r_t}{u^\top r_t} = \frac{1}{1 - \frac{1}{T}} \leq 2. \end{aligned}$$

□

Next we provide the omitted proofs for several lemmas.

<sup>4</sup>The fact that  $\eta_t$  is continuous with respect to  $\{x_1, \dots, x_t\}$  depends on our new increasing learning rate scheme and is not true for the scheme used in previous works [2, 21] based on doubling trick.

*Proof of Lemma 5.* Note that the function  $h_t(x) = e^{-2\beta f_t(x)} = \langle x, r_t \rangle^{2\beta}$  is concave since  $0 \leq 2\beta \leq 1$ . Therefore we have  $h_t(u) \leq h_t(x_t) + \langle \nabla h_t(x_t), u - x_t \rangle$ . Plugging in  $\nabla h_t(x) = -2\beta e^{-2\beta f_t(x)} \nabla f_t(x)$  gives

$$e^{-2\beta f_t(u)} \leq e^{-2\beta f_t(x_t)} (1 - 2\beta \langle \nabla_t, u - x_t \rangle),$$

or equivalently

$$f_t(u) \geq f_t(x_t) - \frac{1}{2\beta} \ln(1 - 2\beta \langle \nabla_t, u - x_t \rangle)$$

By the condition on  $\beta$  we also have  $|2\beta \langle \nabla_t, u - x_t \rangle| \leq \frac{1}{4}$ . Using the fact  $-\ln(1 - z) \geq z + \frac{1}{4}z^2$  for  $|z| \leq \frac{1}{4}$  gives:

$$\begin{aligned} f_t(x_t) - f_t(u) &\leq \langle \nabla_t, x_t - u \rangle - \frac{\beta}{2} \langle \nabla_t, x_t - u \rangle^2 \\ &= \langle \nabla_t, x_t - x_{t+1} \rangle + \langle \nabla_t, x_{t+1} - u \rangle - \frac{\beta}{2} \langle \nabla_t, x_t - u \rangle^2 \\ &\leq \langle \nabla_t, x_t - x_{t+1} \rangle + D_{\psi_t}(u, x_t) - D_{\psi_t}(u, x_{t+1}) - \frac{\beta}{2} \langle \nabla_t, x_t - u \rangle^2, \end{aligned}$$

where the last step follows standard OMD analysis. More specifically, since  $x_{t+1}$  is the minimizer of the function  $F_t(x) \triangleq \langle \nabla_t, x \rangle + D_{\psi_t}(x, x_t)$ , by the first-order optimality condition, we have  $\langle u - x_{t+1}, \nabla F_t(x_{t+1}) \rangle \geq 0$  for all  $u \in \Delta_N$ . Note  $\nabla F_t(x_{t+1}) = \nabla_t + \nabla \psi_t(x_{t+1}) - \nabla \psi_t(x_t)$ . Rearranging the condition gives  $\langle \nabla_t, x_{t+1} - u \rangle \leq \langle \nabla \psi_t(x_{t+1}) - \nabla \psi_t(x_t), u - x_{t+1} \rangle$ . Directly using the definition of Bregman divergence, one can verify  $\langle \nabla \psi_t(x_{t+1}) - \nabla \psi_t(x_t), u - x_{t+1} \rangle = D_{\psi_t}(u, x_t) - D_{\psi_t}(u, x_{t+1}) - D_{\psi_t}(x_{t+1}, x_t)$ , which is further bounded by  $D_{\psi_t}(u, x_t) - D_{\psi_t}(u, x_{t+1})$  by the nonnegativity of Bregman divergence. This concludes the proof.  $\square$

*Proof of Lemma 8.* Define  $\Psi_t(u) = \sum_{s=1}^t f_s(u) + \frac{1}{\gamma} \sum_{i=1}^N \ln \frac{1}{u_i}$ . We first show that if  $\|u_t - u_{t+1}\|_{\nabla^2 \Psi_{t+1}(u_t)} \leq \frac{1}{2}$  holds, then the conclusion follows.

Indeed, note that  $\nabla^2 \Psi_{t+1}(u_t) = \sum_{s=1}^{t+1} \frac{r_s r_s^\top}{\langle u_t, r_s \rangle^2} + \frac{1}{\gamma} \left[ \frac{1}{u_{t,i}^2} \right]_{\text{diag}} \succeq \frac{1}{\gamma} \left[ \frac{1}{u_{t,i}^2} \right]_{\text{diag}}$ , where  $\left[ \frac{1}{u_{t,i}^2} \right]_{\text{diag}}$  represents the  $N$  dimensional diagonal matrix whose  $i$ -th diagonal element is  $\frac{1}{u_{t,i}^2}$ . We thus have

$$\|u_t - u_{t+1}\|_{\frac{1}{\gamma} [1/u_{t,i}^2]_{\text{diag}}} \leq \|u_t - u_{t+1}\|_{\nabla^2 \Psi_{t+1}(u_t)} \leq 1/2,$$

which implies  $\frac{(u_{t,i} - u_{t+1,i})^2}{\gamma u_{t,i}^2} \leq \frac{1}{4}$ , or  $1 - \frac{\sqrt{\gamma}}{2} \leq \frac{u_{t+1,i}}{u_{t,i}} \leq 1 + \frac{\sqrt{\gamma}}{2}$  for all  $i \in [N]$ .

Next, we prove the inequality  $\|u_t - u_{t+1}\|_{\nabla^2 \Psi_{t+1}(u_t)} \leq \frac{1}{2}$ . Note  $u_{t+1} = \arg\min_{x \in \Delta_N} \Psi_{t+1}(x)$ . If we can prove  $\Psi_{t+1}(u') > \Psi_{t+1}(u_t)$  for any  $u'$  that satisfies  $\|u' - u_t\|_{\nabla^2 \Psi_{t+1}(u_t)} = \frac{1}{2}$ , then we obtain the desired inequality  $\|u_t - u_{t+1}\|_{\nabla^2 \Psi_{t+1}(u_t)} \leq \frac{1}{2}$  by the convexity of  $\Psi_{t+1}$ .

By Taylor's expansion, we know there exists some  $\xi$  in the line segment joining  $u'$  and  $u_t$ , such that

$$\begin{aligned} \Psi_{t+1}(u') &= \Psi_{t+1}(u_t) + \nabla \Psi_{t+1}(u_t)^\top (u' - u_t) + \frac{1}{2} (u' - u_t)^\top \nabla^2 \Psi_{t+1}(\xi) (u' - u_t) \\ &= \Psi_{t+1}(u_t) + \nabla f_{t+1}(u_t)^\top (u' - u_t) + \nabla \Psi_t(u_t)^\top (u' - u_t) + \frac{1}{2} \|u' - u_t\|_{\nabla^2 \Psi_{t+1}(\xi)}^2 \\ &\geq \Psi_{t+1}(u_t) + \nabla f_{t+1}(u_t)^\top (u' - u_t) + \frac{1}{2} \|u' - u_t\|_{\nabla^2 \Psi_{t+1}(\xi)}^2 \\ &\geq \Psi_{t+1}(u_t) - \|\nabla f_{t+1}(u_t)\|_{\nabla^{-2} \Psi_{t+1}(u_t)} \|u' - u_t\|_{\nabla^2 \Psi_{t+1}(u_t)} + \frac{1}{2} \|u' - u_t\|_{\nabla^2 \Psi_{t+1}(\xi)}^2 \\ &= \Psi_{t+1}(u_t) - \frac{1}{2} \|\nabla f_{t+1}(u_t)\|_{\nabla^{-2} \Psi_{t+1}(u_t)} + \frac{1}{2} \|u' - u_t\|_{\nabla^2 \Psi_{t+1}(\xi)}^2 \end{aligned} \tag{9}$$

where the first inequality is by the optimality of  $u_t$ . As  $\nabla^2 \Psi_{t+1}(u_t) \succeq \frac{1}{\gamma} \left[ \frac{1}{u_{t,i}^2} \right]_{\text{diag}}$  implies  $\nabla^{-2} \Psi_{t+1}(u_t) \preceq \gamma \left[ u_{t,i}^2 \right]_{\text{diag}}$ , we continue with

$$\|\nabla f_{t+1}(u_t)\|_{\nabla^{-2} \Psi_{t+1}(u_t)}^2 \leq \|\nabla f_{t+1}(u_t)\|_{\gamma \left[ u_{t,i}^2 \right]_{\text{diag}}}^2 = \frac{\gamma r_{t+1}^\top \left[ u_{t,i}^2 \right]_{\text{diag}} r_{t+1}}{\langle u_t, r_{t+1} \rangle^2} = \frac{\gamma \sum_{i=1}^N u_{t,i}^2 r_{t+1,i}^2}{\langle u_t, r_{t+1} \rangle^2} \leq \gamma. \quad (10)$$

Note  $\xi$  is between  $u_t$  and  $u'$ , so  $\|\xi - u_t\|_{\nabla^2 \Psi_{t+1}(u_t)} \leq \frac{1}{2}$  and thus  $\frac{\xi_i}{u_{t,i}} \leq 1 + \frac{\sqrt{\gamma}}{2} \leq \frac{11}{10}$  according to previous discussions. Therefore, we have

$$\nabla^2 \Psi_{t+1}(\xi) = \sum_{s=1}^{t+1} \frac{r_s r_s^\top}{(r_s^\top \xi)^2} + \frac{1}{\gamma} \left[ \frac{1}{\xi_i^2} \right]_{\text{diag}} \succeq \frac{100}{121} \left( \sum_{s=1}^{t+1} \frac{r_s r_s^\top}{(r_s^\top u_t)^2} + \frac{1}{\gamma} \left[ \frac{1}{u_{t,i}^2} \right]_{\text{diag}} \right) = \frac{100}{121} \nabla^2 \Psi_{t+1}(u_t). \quad (11)$$

Now combining inequalities (9), (10) and (11), we arrive at

$$\begin{aligned} \Psi_{t+1}(u') &\geq \Psi_{t+1}(u_t) - \frac{\sqrt{\gamma}}{2} + \frac{50}{121} \|u' - u_t\|_{\nabla^2 \Psi_{t+1}(u_t)}^2 \\ &= \Psi_{t+1}(u_t) - \frac{\sqrt{\gamma}}{2} + \frac{25}{242} \\ &\geq \Psi_{t+1}(u_t), \end{aligned}$$

which finishes the proof.  $\square$

*Proof of Lemma 9.* The proof is similar to the proof of Lemma 8. Denote  $F_t(x) = \langle x, \nabla_t \rangle + D_{\psi_t}(x, x_t)$ . We again first prove that if  $\|x_t - x_{t+1}\|_{\nabla^2 F_t(x_t)} \leq \frac{1}{2}$ , then the conclusion follows.

Note  $\nabla^2 F_t(x_t) = \beta A_t + \left[ \frac{1}{\eta_{t,i} x_{t,i}^2} \right]_{\text{diag}} \succeq \left[ \frac{1}{\eta_{t,i} x_{t,i}^2} \right]_{\text{diag}} \succeq \left[ \frac{1}{3\eta x_{t,i}^2} \right]_{\text{diag}}$ , because  $\eta_{t,i} \leq \eta \exp(\log_T(\frac{NT}{N})) \leq 3\eta$ . Thus we have

$$\|x_t - x_{t+1}\|_{\frac{1}{3\eta} \left[ 1/x_{t,i}^2 \right]_{\text{diag}}} \leq \|x_t - x_{t+1}\|_{\nabla^2 F_t(x_t)} \leq 1/2,$$

which implies  $\frac{(x_{t,i} - x_{t+1,i})^2}{3\eta x_{t,i}^2} \leq \frac{1}{4}$  and thus  $1 - \frac{\sqrt{3\eta}}{2} \leq \frac{x_{t+1,i}}{x_{t,i}} \leq 1 + \frac{\sqrt{3\eta}}{2}$  for all  $i \in [N]$ .

It remains to prove the inequality  $\|x_t - x_{t+1}\|_{\nabla^2 F_t(x_t)} \leq \frac{1}{2}$ . Since  $x_{t+1} = \arg\min_{x \in \bar{\Delta}_N} F_t(x)$ , if we can prove  $F_t(x') > F_t(x_t)$  for all  $x'$  that satisfies  $\|x' - x_t\|_{\nabla^2 F_t(x_t)} = \frac{1}{2}$ , then we obtain the desired inequality  $\|x_t - x_{t+1}\|_{\nabla^2 F_t(x_t)} \leq \frac{1}{2}$  by the convexity of  $F_t$ . By Taylor's expansion, there exists some  $\zeta$  on the line segment joining  $x'$  and  $x_t$ , such that

$$\begin{aligned} F_t(x') &= F_t(x_t) + \nabla F_t(x_t)^\top (x' - x_t) + \frac{1}{2} (x' - x_t)^\top \nabla^2 F_t(\zeta) (x' - x_t) \\ &= F_t(x_t) + \nabla_t^\top (x' - x_t) + \frac{1}{2} \|x' - x_t\|_{\nabla^2 F_t(\zeta)}^2 \\ &\geq F_t(x_t) - \|\nabla_t\|_{\nabla^{-2} F_t(x_t)} \|x' - x_t\|_{\nabla^2 F_t(x_t)} + \frac{1}{2} \|x' - x_t\|_{\nabla^2 F_t(\zeta)}^2 \\ &= F_t(x_t) - \frac{1}{2} \|\nabla_t\|_{\nabla^{-2} F_t(x_t)} + \frac{1}{2} \|x' - x_t\|_{\nabla^2 F_t(\zeta)}^2. \end{aligned} \quad (12)$$

As  $\nabla^2 F_t(x_t) = \beta A_t + \left[ \frac{1}{\eta_{t,i} x_{t,i}^2} \right]_{\text{diag}} \succeq \frac{1}{3\eta} \left[ \frac{1}{x_{t,i}^2} \right]_{\text{diag}}$ , we have  $\nabla^{-2} F_t(x_t) \preceq 3\eta \left[ x_{t,i}^2 \right]_{\text{diag}}$ . Therefore

$$\|\nabla_t\|_{\nabla^{-2} F_t(x_t)}^2 \leq \|\nabla_t\|_{3\eta \left[ x_{t,i}^2 \right]_{\text{diag}}}^2 = \frac{3\eta r_t^\top \left[ x_{t,i}^2 \right]_{\text{diag}} r_t}{\langle x_t, r_t \rangle^2} = \frac{3\eta \sum_{i=1}^N x_{t,i}^2 r_{t,i}^2}{\langle x_t, r_t \rangle^2} \leq 3\eta. \quad (13)$$

Since  $\zeta$  is between  $x_t$  and  $x'$ , we have  $\|\zeta - x_t\|_{\nabla^2 F_t(x_t)} < \frac{1}{2}$  and thus  $\frac{\zeta_i}{x_{t,i}} \leq 1 + \frac{\sqrt{3\eta}}{2} \leq \frac{21}{20}$  according to previous discussions and the fact  $\eta \leq \frac{1}{300}$ . Therefore, we have

$$\nabla^2 F_t(\zeta) = \sum_{s=1}^t \frac{r_s r_s^\top}{(r_s^\top \zeta)^2} + \left[ \frac{1}{\eta_{t,i} \zeta_i^2} \right]_{\text{diag}} \succeq \frac{400}{441} \left( \sum_{s=1}^t \frac{r_s r_s^\top}{(r_s^\top x_t)^2} + \left[ \frac{1}{\eta_{t,i} x_{t,i}^2} \right]_{\text{diag}} \right) = \frac{400}{441} \nabla^2 F_t(x_t). \quad (14)$$

Now combining inequalities (12), (13) and (14), we get

$$\begin{aligned} F_t(x') &\geq F_t(x_t) - \frac{\sqrt{3\eta}}{2} + \frac{200}{441} \|x' - x_t\|_{\nabla^2 F_t(x_t)}^2 \\ &= F_t(x_t) - \frac{\sqrt{3\eta}}{2} + \frac{50}{441} \\ &\geq F_t(u_t), \end{aligned}$$

which finishes the proof.  $\square$
